# Supplementary material
Source: MDPI journal article supplement (https://www.mdpi.com/2073-4433/12/7/917)
Supplement: s1 [file s1]

## Supplementary Materials

# Urban Heat Islands and Vulnerable Populations in a Mid-Size Coastal City in an Arid Environment

Carolina Quintana-Talvac <sup>1</sup>, Oscar Corvacho-Ganahin <sup>1</sup>, Pamela Smith <sup>2</sup>, Pablo Sarricolea <sup>2</sup>,  
Manuel Prieto <sup>1</sup> and Oliver Meseguer-Ruiz <sup>3,\*</sup>

<sup>1</sup> Departamento de Ciencias Históricas y Geográficas, Universidad de Tarapacá, 18 de Septiembre 2222, Arica, Arica 1010069, Chile; carquital@gmail.com (C.Q.-T.); ocorvacho.g@gmail.com (O.C.-G.); mprieto@academicos.uta.cl (M.P.)

<sup>2</sup> Departamento de Geografía, Universidad de Chile. Portugal 84, Santiago Centro, Santiago 8331051, Chile; pamelasmit@uchilefau.cl (P.S.); psarricolea@uchilefau.cl (P.S.)

<sup>3</sup> Departamento de Ciencias Históricas y Geográficas, Universidad de Tarapacá, Luis Emilio Recabarren 2477, Iquique 1101783, Chile

\* Correspondence: omeseguer@academicos.uta.cl

**Supplementary Materials:** The following are available online at [www.mdpi.com/article/10.3390/atmos12070917/s1](http://www.mdpi.com/article/10.3390/atmos12070917/s1)

**Table S1.** Annual averages for the 1985-2019 period and satellite images used according to warm and cold seasons

| Years | Annual temperature (°C) | Satellite images |             |       | Years | Annual temperature (°C) | Satellite images |             |       |
|-------|-------------------------|------------------|-------------|-------|-------|-------------------------|------------------|-------------|-------|
|       |                         | Warm season      | Cold season | Total |       |                         | Warm season      | Cold season | Total |
| 1985  | 30.80                   | 1                | 1           | 2     | 2004  | 29.81                   | 9                | 1           | 10    |
| 1987  | 33.59                   | 1                | 1           | 2     | 2005  | 30.55                   | 8                | 1           | 9     |
| 1988  | 29.73                   | 5                | 2           | 7     | 2006  | 28.7                    | 7                | 2           | 9     |
| 1989  | 29.64                   | 2                | 1           | 3     | 2007  | 31.54                   | 8                | 1           | 9     |
| 1990  | 27.38                   | 4                | 0           | 4     | 2008  | 30.20                   | 11               | 1           | 12    |
| 1991  | 27.37                   | 3                | 1           | 4     | 2009  | 31.08                   | 8                | 2           | 10    |
| 1992  | 30.77                   | 1                | 2           | 3     | 2010  | 30.27                   | 5                | 2           | 7     |
| 1993  | 29.16                   | 3                | 0           | 3     | 2011  | 29.36                   | 2                | 2           | 4     |
| 1995  | 29.07                   | 4                | 1           | 5     | 2012  | 31.20                   | 6                | 1           | 7     |
| 1996  | 28.47                   | 3                | 1           | 4     | 2013  | 33.12                   | 7                | 3           | 10    |
| 1997  | 26.19                   | 2                | 1           | 3     | 2014  | 32.18                   | 7                | 4           | 11    |
| 1998  | 28.81                   | 5                | 2           | 7     | 2015  | 31.42                   | 5                | 1           | 6     |
| 1999  | 30.96                   | 2                | 3           | 5     | 2016  | 31.95                   | 12               | 3           | 15    |
| 2000  | 29.96                   | 7                | 2           | 9     | 2017  | 30.66                   | 8                | 1           | 9     |
| 2001  | 28.71                   | 6                | 0           | 6     | 2018  | 31.45                   | 8                | 1           | 9     |
| 2002  | 32.65                   | 5                | 1           | 6     | 2019  | 31.27                   | 10               | 4           | 14    |
| 2003  | 32.57                   | 6                | 2           | 8     | Total | 30.32                   | 181              | 51          | 232   |

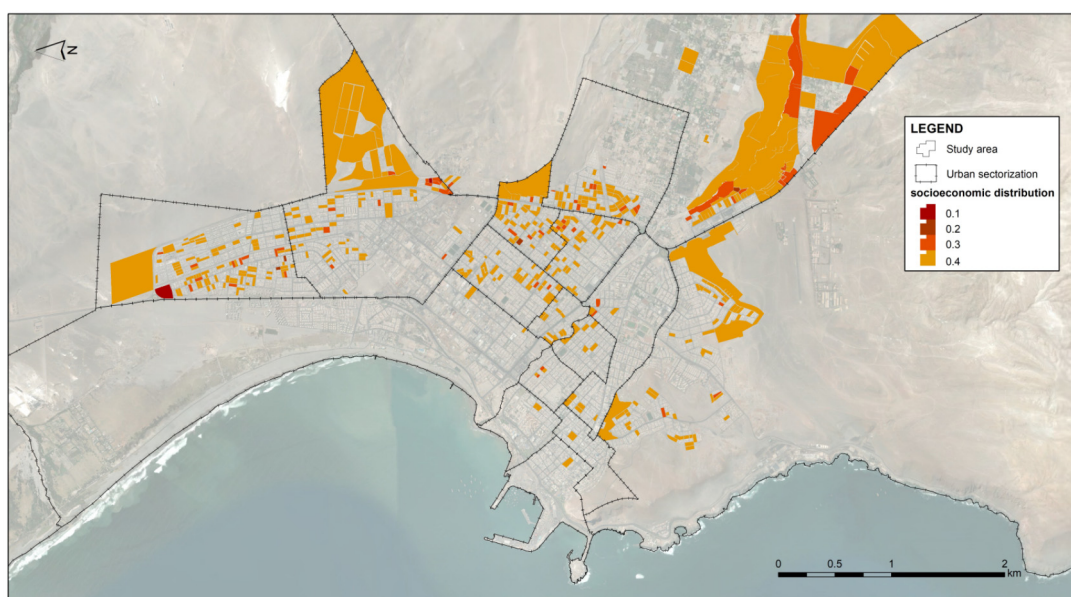

Figure S1. Spatial distribution of the low TWi.

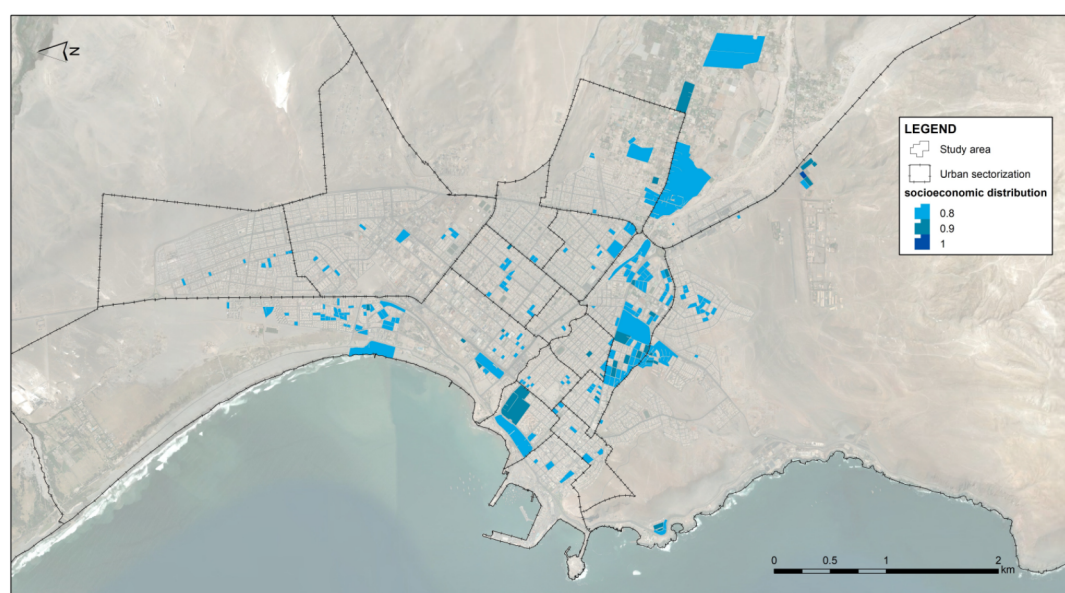

Figure S2. Spatial distribution of the high TWi.
